# Supplementary material for: EDA Complexes of N-halosaccharins with N- and O-donor ligands
Source: Royal Society of Chemistry journal article supplement (doi:10.1039/b9nj00263d), 2009-01-01
Supplement: b9nj00263d.pdf [file b9nj00263d.pdf]

## **Supplementary data for the paper**

### **EDA Complexes of *N*-halosaccharins with N- and O-donor ligands**

by

Darko Dolenc and Barbara Modec

University of Ljubljana

Faculty of Chemistry and Chemical Technology

Aškerčeva 5, SI-1000 Ljubljana, Slovenia

### **Contents**

#### **1. Solid state structures**

##### **1. 1 Figures**

##### **1. 2 Listings of structural parameters for *N*-halosaccharin complexes and *N*-bromosaccharin**

#### **2. Computed geometries and enthalpies of halosaccharins and complexes**

##### **2.1 xyz coordinates of NISac and NBSac and EDA complexes of NISac and NBSac**

##### **2.2 Computed X–L and N–X bond lengths and total enthalpies**

## 1. Solid state structures

### 1. 1. Figures

**Fig. S1**

An ORTEP drawing of NISac·THF with thermal ellipsoids drawn at the 30% probability level.

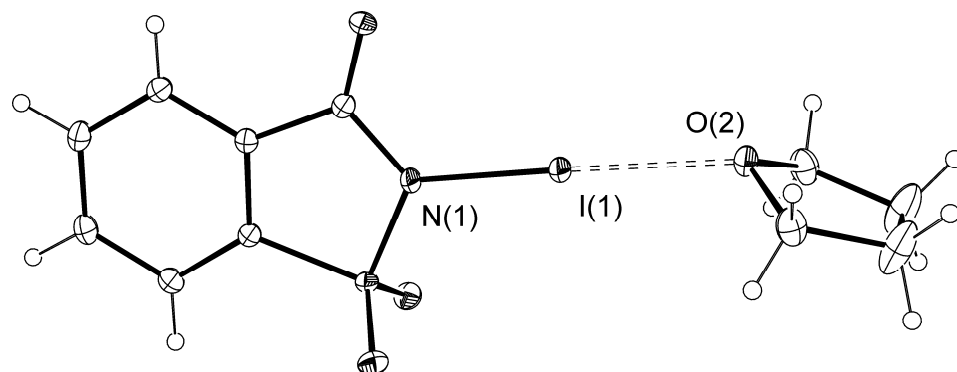

**Fig. S2**

An ORTEP drawing of NISac·Py with thermal ellipsoids drawn at the 30% probability level.

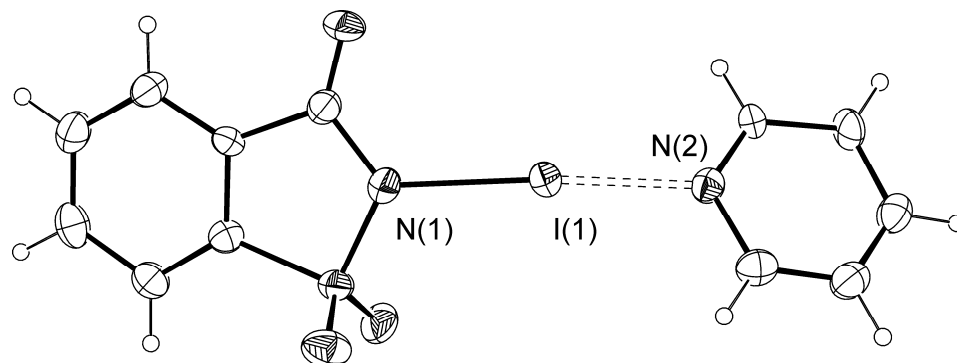

**Fig. S3**

An ORTEP drawing of  $(\text{NBSac})_2 \cdot \text{Pyz}$  with thermal ellipsoids drawn at the 30% probability level.

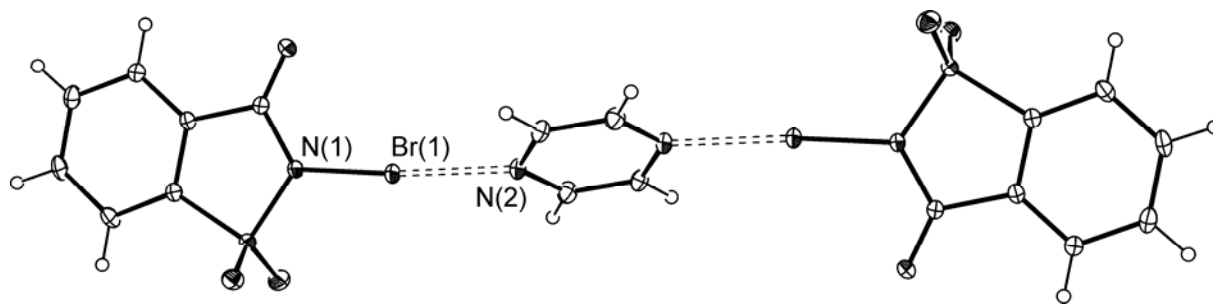

**Fig. S4**

ORTEP drawings of both molecules in the asymmetric unit of NBSac with thermal ellipsoids drawn at the 30% probability level.

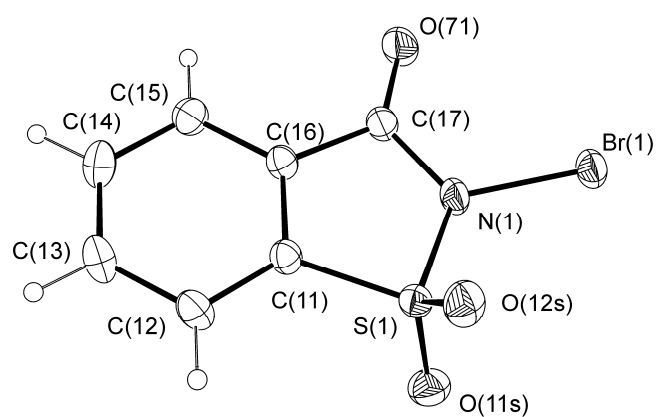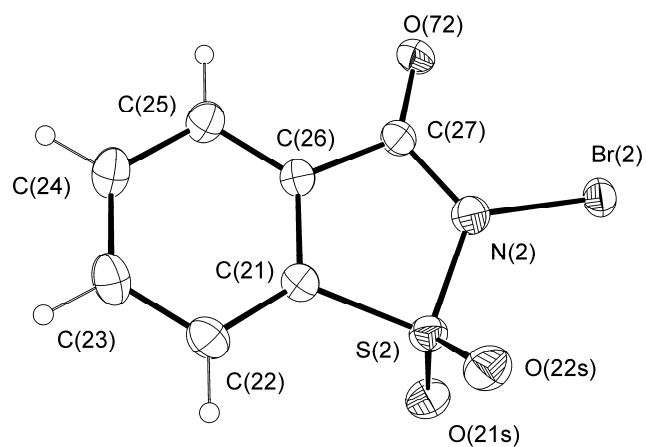

**Fig. S5**

A projection along the aromatic plane of the “non-planar” *N*-bromosaccharin molecule.

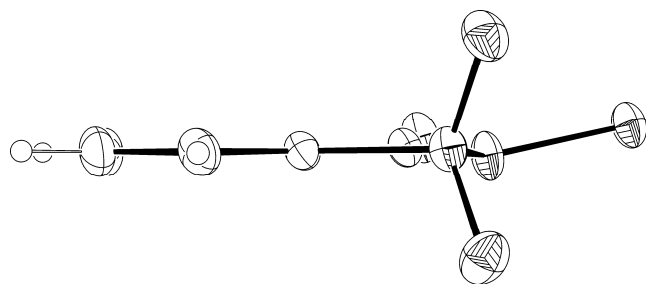

**Fig. S6**

A section of a layer in NISac·H<sub>2</sub>O. The layers are perpendicular to the *c* axis. Each adduct forms four hydrogen bonds, drawn as dashed lines, with four adjacent adducts. Water molecule is engaged in hydrogen bonds with carbonyl [O(1)⋯O(7)<sup>i</sup> = 2.770(3) Å] and sulfone oxygen [O(1)⋯O(2S)<sup>ii</sup> = 2.820(3) Å] atoms. Symmetry codes: (i)  $-x+3/2, y+1/2, -z+3/2$ ; (ii)  $-x+1/2, y+1/2, -z+3/2$ .

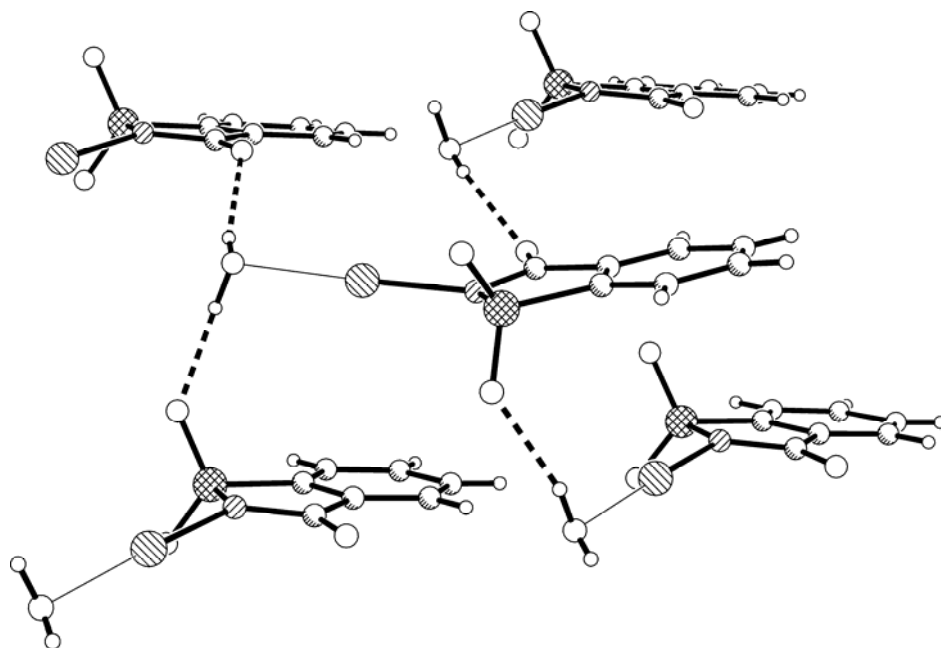

**Fig. S7**

A section of a triple chain of “halogen-bonded” molecules in NBSac. Non-planar molecules of *N*-bromosaccharin are shown in green, whereas the planar ones are shown in blue. The chains propagate along the *a* axis.

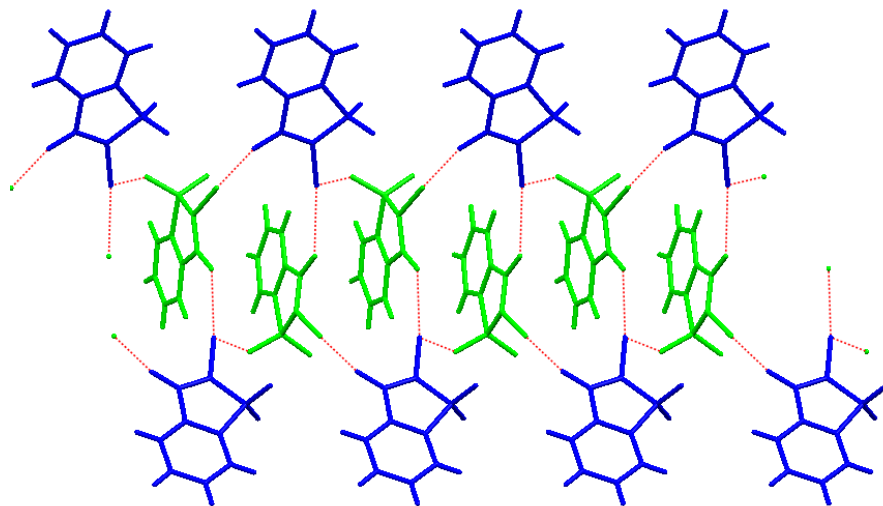

## 1. 2. Listings of structural parameters for *N*-halosaccharin complexes and *N*-bromosaccharin

**Table S1.**

Bond lengths (Å) and angles (°) for NISac·H<sub>2</sub>O, NISac·THF and NISac·Py<sup>a</sup>

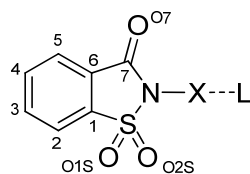

|               | <b>NISac·H<sub>2</sub>O</b> | <b>NISac·THF</b> | <b>NISac·Py</b> |
|---------------|-----------------------------|------------------|-----------------|
| N–X           | 2.096(2)                    | 2.073(2)         | 2.254(11)       |
| X···L         | 2.443(2)                    | 2.512(2)         | 2.279(11)       |
| N–X···L       | 177.68(7)                   | 178.51(9)        | 174.5(4)        |
| C(7)–O(7)     | 1.215(3)                    | 1.217(4)         | 1.178(16)       |
| C(7)–N        | 1.386(3)                    | 1.381(4)         | 1.392(16)       |
| N–S           | 1.664(2)                    | 1.664(3)         | 1.611(12)       |
| C(7)–N–S      | 114.4(2)                    | 115.7(2)         | 115.7(9)        |
| S–O(1S)       | 1.431(2)                    | 1.432(2)         | 1.406(11)       |
| S–O(2S)       | 1.435(2)                    | 1.432(2)         | 1.458(11)       |
| O(1S)–S–O(2S) | 116.2(1)                    | 116.7(1)         | 116.6(7)        |
| S–C(1)        | 1.756(2)                    | 1.758(3)         | 1.758(13)       |
| N–S–C(1)      | 93.6(1)                     | 92.7(1)          | 94.8(6)         |

<sup>a</sup> Same atom labels are used as in the chart above.

**Table S2.**

Bond lengths (Å) and angles (°) for (NISac)<sub>2</sub>·Pyz, (NBSac)<sub>2</sub>·Pyz and NBSac<sup>a</sup>

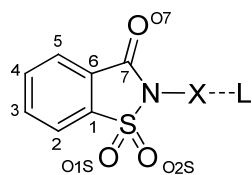

|               | (NISac) <sub>2</sub> ·Pyz | (NBSac) <sub>2</sub> ·Pyz | NBSac <sup>b</sup> |
|---------------|---------------------------|---------------------------|--------------------|
| N–X           | 2.142(2)                  | 1.906(1)                  | 1.847(2), 1.835(3) |
| X···L         | 2.423(2)                  | 2.410(1)                  | –                  |
| N–X···L       | 175.26(6)                 | 175.22(6)                 | –                  |
| C(7)–O(7)     | 1.214(3)                  | 1.209(2)                  | 1.201(3), 1.203(3) |
| C(7)–N        | 1.384(3)                  | 1.387(2)                  | 1.393(4), 1.379(4) |
| N–S           | 1.654(2)                  | 1.664(2)                  | 1.699(2), 1.699(3) |
| C(7)–N–S      | 114.6(1)                  | 115.9(1)                  | 115.6(2), 116.5(2) |
| S–O(1S)       | 1.428(2)                  | 1.428(1)                  | 1.416(2), 1.419(2) |
| S–O(2S)       | 1.436(2)                  | 1.435(1)                  | 1.422(2), 1.421(2) |
| O(1S)–S–O(2S) | 116.8(1)                  | 117.15(8)                 | 117.6(2), 118.7(2) |
| S–C(1)        | 1.759(2)                  | 1.757(2)                  | 1.748(3), 1.759(3) |
| N–S–C(1)      | 93.76(9)                  | 92.58(7)                  | 91.3(1), 91.1(1)   |

<sup>a</sup> Same atom labels are used as in the chart above. <sup>b</sup> Two sets of parameters, one for each molecule in the asymmetric unit.

## 2. Computed geometries and enthalpies of halosaccharins and complexes

### 2.1 xyz coordinates of NISac and NBSac and their EDA complexes

MPW1K/6-311+G\*\*

#### NBSac

|      |               |               |               |
|------|---------------|---------------|---------------|
| C1   | -4.0069812900 | -0.7283380650 | 0.0002434897  |
| C2   | -3.9932903628 | 0.6593184056  | 0.0007631261  |
| C3   | -2.7993632691 | 1.3629745293  | 0.0011800760  |
| C4   | -1.6401766561 | 0.6233663734  | 0.0008620388  |
| C5   | -1.6365046132 | -0.7554251653 | 0.0005784948  |
| C6   | -2.8265846058 | -1.4517578243 | 0.0002302194  |
| C7   | -0.2831653071 | -1.3597631878 | 0.0008350551  |
| N8   | 0.6302656431  | -0.3225115526 | 0.0054579589  |
| S9   | 0.0044770662  | 1.2583878603  | 0.0008997726  |
| O10  | -0.0139617837 | -2.5197392887 | -0.0018691621 |
| O11  | 0.3279407573  | 1.8991035911  | -1.2359444979 |
| O12  | 0.3252989809  | 1.9050679959  | 1.2352784808  |
| Br13 | 2.4721452380  | -0.6073476396 | -0.0013606992 |
| H14  | -4.9512731341 | -1.2484913678 | -0.0000828608 |
| H15  | -4.9249360873 | 1.2016214840  | 0.0008470410  |
| H16  | -2.7815846732 | 2.4401546490  | 0.0016342884  |
| H17  | -2.8169217310 | -2.5294355964 | 0.0000059272  |

#### NISac

|     |               |               |               |
|-----|---------------|---------------|---------------|
| C1  | -4.2362000826 | -0.6933632784 | -0.0001604590 |
| C2  | -4.2234449126 | 0.6946114350  | 0.0000280750  |
| C3  | -3.0301559949 | 1.3988490979  | 0.0000417858  |
| C4  | -1.8709641340 | 0.6592164750  | -0.0001203753 |
| C5  | -1.8659882845 | -0.7184552827 | -0.0002695188 |
| C6  | -3.0555550662 | -1.4162224724 | -0.0003084888 |
| C7  | -0.5093447230 | -1.3153169095 | -0.0002105914 |
| N8  | 0.4127846036  | -0.2852626336 | 0.0001451219  |
| S9  | -0.2236623941 | 1.2860863077  | -0.0001218872 |
| O10 | -0.2425903793 | -2.4776541112 | -0.0003587072 |
| O11 | 0.0959016682  | 1.9343009545  | -1.2355623027 |
| O12 | 0.0957729117  | 1.9347536750  | 1.2351131856  |
| I13 | 2.4171304362  | -0.6040747047 | 0.0002921021  |
| H14 | -5.1804202298 | -1.2138166126 | -0.0001613995 |
| H15 | -5.1555928652 | 1.2361722272  | 0.0001810299  |
| H16 | -3.0123054847 | 2.4760079323  | 0.0001963352  |
| H17 | -3.0457647922 | -2.4938997516 | -0.0004135343 |



**NISac-Py**

|     |               |               |               |
|-----|---------------|---------------|---------------|
| C1  | -4.5941117715 | -0.8696632007 | -0.2040648850 |
| C2  | -4.6806306281 | 0.4912730450  | 0.0573511365  |
| C3  | -3.5408107836 | 1.2636593956  | 0.2111597263  |
| C4  | -2.3311421098 | 0.6199428196  | 0.0926968011  |
| C5  | -2.2292790659 | -0.7271187593 | -0.1653968091 |
| C6  | -3.3645185683 | -1.4943549957 | -0.3183273188 |
| C7  | -0.8252941004 | -1.2066131132 | -0.2508052409 |
| N8  | 0.0256477498  | -0.1516118740 | -0.0397373294 |
| S9  | -0.7167657412 | 1.3212357552  | 0.2327594962  |
| O10 | -0.4901039767 | -2.3363684174 | -0.4684897578 |
| O11 | -0.4431978141 | 2.2207392868  | -0.8523976856 |
| O12 | -0.4552690346 | 1.7682884735  | 1.5717528442  |
| H13 | -5.4985580667 | -1.4452831737 | -0.3190775171 |
| H14 | -5.6495302235 | 0.9563977723  | 0.1423218683  |
| H15 | -3.6003755392 | 2.3201414877  | 0.4139114848  |
| H16 | -3.2740737522 | -2.5490336446 | -0.5205429258 |
| I17 | 2.1193561436  | -0.3426954688 | -0.0874989012 |
| C18 | 7.3373403228  | -0.8962386490 | -0.1832045002 |
| C19 | 6.7706727780  | 0.3644635194  | -0.1833358459 |
| C20 | 5.3947212332  | 0.4688506902  | -0.1625667684 |
| N21 | 4.6046290979  | -0.5948298555 | -0.1422649753 |
| C22 | 5.1443385189  | -1.8052930111 | -0.1420395088 |
| C23 | 6.5100111955  | -2.0034115483 | -0.1623312259 |
| H24 | 8.4091476925  | -1.0145179270 | -0.1990485701 |
| H25 | 7.3777651097  | 1.2540506916  | -0.1992282659 |
| H26 | 4.9038882423  | 1.4302411493  | -0.1617180803 |
| H27 | 4.4548417800  | -2.6357868625 | -0.1251513848 |
| H28 | 6.9089901425  | -3.0039024920 | -0.1616798572 |

**NISac-Py (B3LYP/6-311+G\*\*)**

|     |               |               |               |
|-----|---------------|---------------|---------------|
| C1  | -4.6664821898 | -0.8671649813 | -0.2050919648 |
| C2  | -4.7554723115 | 0.5013482150  | 0.0687610471  |
| C3  | -3.6058869145 | 1.2778325722  | 0.2270843867  |
| C4  | -2.3879420242 | 0.6315791737  | 0.1005372329  |
| C5  | -2.2793901180 | -0.7243553971 | -0.1695636701 |
| C6  | -3.4262150616 | -1.4936163675 | -0.3271039505 |
| C7  | -0.8671135440 | -1.2142957550 | -0.2638346282 |
| N8  | 0.0028296208  | -0.1611710582 | -0.0416993796 |
| S9  | -0.7516668110 | 1.3501083629  | 0.2459177295  |
| O10 | -0.5399757249 | -2.3592173264 | -0.4969239797 |
| O11 | -0.4773942930 | 2.2686954424  | -0.8533514191 |
| O12 | -0.4855141497 | 1.7961203223  | 1.6087200788  |
| H13 | -5.5744167266 | -1.4468095922 | -0.3236626384 |
| H14 | -5.7287919719 | 0.9688920818  | 0.1597802482  |
| H15 | -3.6658454436 | 2.3381231133  | 0.4386303999  |
| H16 | -3.3375034871 | -2.5523547063 | -0.5388020492 |
| I17 | 2.1358209917  | -0.3558297612 | -0.0930934820 |
| C18 | 7.4317713662  | -0.8993751182 | -0.1768954013 |
| C19 | 6.8571594239  | 0.3683194048  | -0.1947178625 |
| C20 | 5.4708003435  | 0.4732110566  | -0.1785414773 |
| N21 | 4.6740211989  | -0.6017262764 | -0.1460520503 |
| C22 | 5.2239426721  | -1.8221922644 | -0.1295553392 |
| C23 | 6.6005050279  | -2.0154705025 | -0.1438408591 |
| H24 | 8.5093297838  | -1.0158238697 | -0.1886436360 |
| H25 | 7.4659534647  | 1.2632397590  | -0.2207575943 |
| H26 | 4.9768138813  | 1.4385892565  | -0.1903647064 |
| H27 | 4.5347930895  | -2.6591986351 | -0.1035759758 |
| H28 | 7.0050465319  | -3.0196708093 | -0.1295738440 |

### NISac·THF

|     |               |               |               |
|-----|---------------|---------------|---------------|
| C1  | -4.5288935813 | -0.8042527980 | -0.5325144435 |
| C2  | -4.6184985678 | 0.5605648434  | -0.2964647692 |
| C3  | -3.4862847458 | 1.3200344417  | -0.0514068983 |
| C4  | -2.2794383894 | 0.6598192030  | -0.0533700274 |
| C5  | -2.1753657303 | -0.6927995954 | -0.2854122544 |
| C6  | -3.3035483350 | -1.4465451134 | -0.5296866017 |
| C7  | -0.7812763004 | -1.1981666930 | -0.2401607364 |
| N8  | 0.0622075572  | -0.1445734639 | 0.0371203275  |
| S9  | -0.6818284051 | 1.3521186647  | 0.2259897764  |
| O10 | -0.4399955892 | -2.3293692662 | -0.4145984225 |
| O11 | -0.2990274509 | 2.2244419710  | -0.8451495399 |
| O12 | -0.5401888894 | 1.8032253238  | 1.5785593576  |
| H13 | -5.4275754892 | -1.3691251321 | -0.7198717888 |
| H14 | -5.5842999790 | 1.0391465973  | -0.3032278951 |
| H15 | -3.5496921021 | 2.3792548165  | 0.1329077808  |
| H16 | -3.2111217422 | -2.5047454097 | -0.7098850876 |
| I17 | 2.1069913052  | -0.3786882833 | 0.1985917680  |
| O18 | 4.6738392513  | -0.7297926666 | 0.3479685396  |
| C19 | 5.5203991948  | 0.2999313977  | -0.1320897517 |
| H20 | 4.9917282745  | 1.2409321756  | -0.0333046701 |
| H21 | 6.4143797809  | 0.3335537151  | 0.4916935421  |
| C22 | 5.1877061185  | -1.9364726013 | -0.1873964286 |
| H23 | 4.4157598401  | -2.6934378746 | -0.1096081220 |
| H24 | 6.0452065886  | -2.2465911595 | 0.4114036838  |
| C25 | 5.5946807182  | -1.5984424352 | -1.6150279891 |
| H26 | 6.4657096486  | -2.1660392838 | -1.9263489466 |
| H27 | 4.7870432420  | -1.8266007882 | -2.3033230236 |
| C28 | 5.8555529612  | -0.0839777354 | -1.5695526216 |
| H29 | 5.2088672508  | 0.4378020349  | -2.2674888960 |
| H30 | 6.8813050603  | 0.1705565255  | -1.8163022797 |

### NISac·H<sub>2</sub>O

|     |               |               |               |
|-----|---------------|---------------|---------------|
| C1  | -4.4871668308 | -0.8355514207 | 0.0390920043  |
| C2  | -4.5510169962 | 0.5511736532  | 0.0241278333  |
| C3  | -3.3986533659 | 1.3200602052  | 0.0016519554  |
| C4  | -2.1999391200 | 0.6460114910  | -0.0046305956 |
| C5  | -2.1197954933 | -0.7280031111 | 0.0099946966  |
| C6  | -3.2682002006 | -1.4911504334 | 0.0321232230  |
| C7  | -0.7292594044 | -1.2438224047 | 0.0004943022  |
| N8  | 0.1378058344  | -0.1731946947 | -0.0204630899 |
| S9  | -0.5833692464 | 1.3505177400  | -0.0322933730 |
| O10 | -0.4052573988 | -2.3939319320 | 0.0101720427  |
| O11 | -0.3199911049 | 2.0076567991  | -1.2778109436 |
| O12 | -0.2903331776 | 2.0379333266  | 1.1905765650  |
| H13 | -5.4011504185 | -1.4073207561 | 0.0564535438  |
| H14 | -5.5119220919 | 1.0399201013  | 0.0299852320  |
| H15 | -3.4406558236 | 2.3964522525  | -0.0103334570 |
| H16 | -3.1968021127 | -2.5664211379 | 0.0435312869  |
| I17 | 2.1765101131  | -0.3952646683 | -0.0304156817 |
| O18 | 4.8653398439  | -0.7552431580 | -0.0279767067 |
| H19 | 5.2360379993  | -1.5627355121 | -0.3703025715 |
| H20 | 5.3987236911  | -0.4945825766 | 0.7164183220  |

**(NISac)<sub>2</sub>·Pyz**

|     |                |               |               |
|-----|----------------|---------------|---------------|
| C1  | -9.3110354387  | 1.0570770779  | -1.3760241085 |
| C2  | -10.6123713299 | 0.8206599777  | -0.9331640978 |
| C3  | 9.7606512340   | 0.4245014452  | -1.0260629806 |
| C4  | 0.6658339038   | -0.0458844086 | -1.1247552669 |
| C5  | -6.8053255308  | 0.6976301057  | -0.9380528769 |
| C6  | -8.2576236610  | 0.5498218707  | -0.6336650916 |
| C7  | -0.7139169432  | -0.0572220209 | -1.0809288528 |
| C8  | 8.5018523744   | 0.1756462699  | -0.5557118530 |
| C9  | 10.8119459031  | -0.0789681315 | -0.2825327911 |
| C10 | -10.8515373137 | 0.0932721471  | 0.2241096405  |
| C11 | -8.5098134641  | -0.1699944884 | 0.5111760494  |
| C12 | 8.2683409997   | -0.5368521877 | 0.5971811664  |
| C13 | 10.5926741826  | -0.7994579977 | 0.8817502800  |
| C14 | -9.7952381368  | -0.4188968571 | 0.9713906899  |
| C15 | 6.8314793526   | -0.6874278887 | 0.9194301454  |
| C16 | 9.3161148974   | -1.0366075925 | 1.3349694462  |
| C17 | 0.7373367914   | -0.0011966241 | 1.1390577640  |
| C18 | -0.6418421461  | -0.0113876659 | 1.1824297402  |
| H19 | -9.1028149877  | 1.6188387129  | -2.2725355394 |
| H20 | -11.4545426767 | 1.2065621111  | -1.4936488504 |
| H21 | 9.9218041565   | 0.9853480383  | -1.9303284809 |
| H22 | 1.1980184094   | -0.0598753795 | -2.0618905849 |
| H23 | -1.3053758175  | -0.0784405328 | -1.9819930260 |
| H24 | 11.8165432293  | 0.0916526257  | -0.6139167261 |
| H25 | -11.8748313389 | -0.0760579813 | 0.5482991455  |
| H26 | 11.4316355952  | -1.1789621646 | 1.4392807271  |
| H27 | -9.9718219990  | -0.9854337041 | 1.8717151206  |
| H28 | 9.1224377641   | -1.5938158328 | 2.2346220701  |
| H29 | 1.3281854893   | 0.0208721382  | 2.0403851529  |
| H30 | -1.1744811694  | 0.0025401762  | 2.1193526817  |
| N31 | 6.0965546072   | -0.0479470958 | -0.0503811724 |
| N32 | 1.3798550209   | -0.0185105208 | -0.0136507453 |
| N33 | -6.0731996732  | 0.0557796937  | 0.0378319430  |
| N34 | -1.3564089111  | -0.0402704366 | 0.0723947661  |
| O35 | 6.7367327465   | 0.0170260458  | -2.5157162680 |
| O36 | -6.3362819405  | 1.2785269896  | -1.8742773128 |
| O37 | 6.8251652753   | 2.1062128437  | -1.2256738404 |
| O38 | -6.8269343421  | -2.1129476722 | 1.1656177162  |
| O39 | 6.3846218824   | -1.2674502354 | 1.8623854328  |
| O40 | -6.7476306733  | -0.0209316212 | 2.5024635113  |
| S41 | 6.9789321348   | 0.6841360995  | -1.2780663873 |
| S42 | -6.9828157493  | -0.6858435892 | 1.2410214007  |
| I43 | 4.0284297066   | -0.0199475579 | -0.0511411665 |
| I44 | -4.0019253436  | -0.0089060262 | 0.0809526479  |

**(NBSac)<sub>2</sub>-Pyz**

|      |                |               |               |
|------|----------------|---------------|---------------|
| C1   | 10.2117194481  | -0.3362710428 | -2.1492194377 |
| C2   | 8.9729954100   | 0.2788781666  | -2.2015913075 |
| C3   | 10.3728926010  | -1.5622810598 | -1.5189424819 |
| C4   | 7.9042324143   | -0.3605076474 | -1.6110302495 |
| C5   | 6.5087086738   | 0.1397851204  | -1.5676247143 |
| C6   | 9.3003247279   | -2.2073652220 | -0.9245482859 |
| C7   | 8.0798671276   | -1.5772772624 | -0.9903441016 |
| C8   | 0.5001551375   | -1.3127511803 | -0.3370558280 |
| C9   | -0.8631308000  | -1.1491098713 | -0.1651909014 |
| C10  | -9.2202342575  | 2.3119000916  | 1.0593579315  |
| C11  | -8.0409849495  | 1.6048101934  | 1.0481711985  |
| C12  | 0.8090334170   | 0.9022162681  | 0.0062270705  |
| C13  | -0.5541018919  | 1.0658898022  | 0.1781455752  |
| C14  | -10.3098221216 | 1.7061031102  | 1.6639447183  |
| C15  | -7.9212319210  | 0.3498363341  | 1.6025127957  |
| C16  | -6.5616652754  | -0.2312602645 | 1.4847044463  |
| C17  | -10.2048093600 | 0.4423152665  | 2.2280706139  |
| C18  | -9.0070772839  | -0.2508971202 | 2.2025569790  |
| H19  | 11.0647199339  | 0.1417863063  | -2.6037390457 |
| H20  | 8.8264382440   | 1.2306514667  | -2.6858917280 |
| H21  | 11.3472690947  | -2.0227378159 | -1.4901225514 |
| H22  | 9.4180794529   | -3.1593153383 | -0.4338746299 |
| H23  | 0.9288795854   | -2.2805758834 | -0.5466881221 |
| H24  | -1.5433123208  | -1.9838772768 | -0.2342050841 |
| H25  | -9.2938777153  | 3.2926690210  | 0.6196193285  |
| H26  | -11.2530644157 | 2.2271978839  | 1.6957523343  |
| H27  | 1.4892910528   | 1.7369337487  | 0.0754160187  |
| H28  | -0.9830091280  | 2.0335876845  | 0.3883387136  |
| H29  | -11.0697252532 | -0.0037329413 | 2.6924191872  |
| H30  | -8.9047798009  | -1.2329324837 | 2.6349835389  |
| N31  | 5.7468879431   | -0.7845446357 | -0.8901965128 |
| N32  | 1.3261695393   | -0.2858826175 | -0.2497858755 |
| N33  | -1.3801280845  | 0.0389529325  | 0.0912353044  |
| N34  | -5.7684795522  | 0.6750222293  | 0.8188733425  |
| O35  | 6.1084734272   | 1.1627762726  | -2.0352061147 |
| O36  | -6.5613500553  | 2.2125052702  | -1.0667522847 |
| O37  | 6.0786864757   | -3.3155358227 | -1.0341768407 |
| O38  | -5.9312341210  | 3.2099528453  | 1.1009908588  |
| O39  | 6.5589671503   | -2.1723038685 | 1.0999060464  |
| O40  | -6.2090917042  | -1.2959698456 | 1.8938345831  |
| S41  | 6.5496856050   | -2.1586992872 | -0.3326244886 |
| S42  | -6.5011622311  | 2.1232142375  | 0.3616509884  |
| Br43 | 3.8817915196   | -0.5776206389 | -0.6109703224 |
| Br44 | -3.9208514203  | 0.3892558302  | 0.4946646240  |

## 2.2 Computed X–L and N–X bond lengths and total enthalpies

**Table S3. Computed X–L and N–X bond lengths and total enthalpies of NISac and NBSac and their EDA complexes<sup>a</sup>**

| Compound                | Method               | d(X···L)<br>Å | d(N–X)<br>Å | $H_{\text{tot}}$ /Hartree <sup>b</sup> |
|-------------------------|----------------------|---------------|-------------|----------------------------------------|
| NISac·H <sub>2</sub> O  | B                    | 2.789         | 2.081       | -1035.559789                           |
| NISac·H <sub>2</sub> O  | M                    | 2.713         | 2.051       | -1035.645750                           |
| NISac·H <sub>2</sub> O  | B (sol) <sup>c</sup> | 2.707         | 2.105       | –                                      |
| NISac·H <sub>2</sub> O  | M (sol) <sup>c</sup> | 2.592         | 2.080       | –                                      |
| NISac·THF               | B                    | 2.640         | 2.097       | -1191.524731                           |
| NISac·THF               | M                    | 2.588         | 2.063       | -1191.645162                           |
| NISac·Py                | B                    | 2.551         | 2.142       | -1207.393259                           |
| NISac·Py                | M                    | 2.499         | 2.103       | -1207.505438                           |
| NISac·Py                | B (sol) <sup>c</sup> | 2.361         | 2.282       | –                                      |
| NISac·Py                | M (sol) <sup>c</sup> | 2.307         | 2.232       | –                                      |
| NISac <sub>2</sub> ·Pyz | B                    | 2.670         | 2.107       | -2182.565658                           |
| NISac <sub>2</sub> ·Pyz | M                    | 2.646         | 2.073       | -2182.760659                           |
| NBSac <sub>2</sub> ·Pyz | B                    | 2.614         | 1.944       | -2186.089387                           |
| NBSac <sub>2</sub> ·Pyz | M                    | 2.596         | 1.897       | -2186.286242                           |
| NISac                   | B                    | –             | 2.060       | -959.117159                            |
| NISac                   | M                    | –             | 2.029       | -959.208636                            |
| NBSac                   | B                    | –             | 1.900       | -960.882790                            |
| NBSac                   | M                    | –             | 1.864       | -960.973866                            |
| H <sub>2</sub> O        | B                    | –             | –           | -76.433395                             |
| H <sub>2</sub> O        | M                    | –             | –           | -76.427494                             |
| THF                     | B                    | –             | –           | -232.396225                            |
| THF                     | M                    | –             | –           | -232.423884                            |
| Py                      | B                    | –             | –           | -248.257113                            |
| Py                      | M                    | –             | –           | -248.276419                            |
| Pyz                     | B                    | –             | –           | -264.305637                            |
| Pyz                     | M                    | –             | –           | -264.316875                            |

<sup>a</sup> (B) B3LYP or (M) MPW1K/6-311+G\*\* in vacuum. <sup>b</sup> Total enthalpy at 25 °C. <sup>c</sup> Geometry optimized in solution in DMSO.
